# Supplementary material for: Novel Cocrystals of Vonoprazan: Machine Learning-Assisted Discovery
Source: MDPI journal article supplement (doi:10.3390/pharmaceutics14020429), 2022-02-16
Supplement: s1 [file s1]

Table S1. Classification results of 51 VPZ-coformer pairs using the ANN model.

| Coformer                        | Predicted label |
|---------------------------------|-----------------|
| Pyrocatechol (CAT)              | 1               |
| Hydroquinone (HYQ)              | 1               |
| Resorcinol (RES)                | 1               |
| Pyrogallol (GAL)                | 1               |
| Methyl-hydroquinone (MHQ)       | 1               |
| Acetamide (ACT)                 | 1               |
| Glycolamide (GLY)               | 1               |
| Benzamide (BZM)                 | 1               |
| Nicotinamide (NCT)              | 1               |
| Isonicotinamide (INCT)          | 1               |
| Urea                            | 1               |
| Benzoic acid (BZA)              | 1               |
| Succinic acid (SUC)             | 1               |
| pyroglutamic acid (PGA)         | 1               |
| 4-hydroxybenzoic acid (4HBA)    | 1               |
| Pyrrole-2-carboxylic acid (PCA) | 1               |
| oxamic acid (OXM)               | 1               |
| Saccharin (SAC)                 | 1               |
| Piperazine (PIP)                | 1               |
| Orcinol                         | 0               |
| Phloroglucinol                  | 0               |
| L-prolinamide                   | 0               |
| Adipic acid                     | 0               |
| Suberic acid                    | 0               |
| Glutaric acid                   | 0               |
| Phthalic acid                   | 0               |
| 4-phenylbutyric acid            | 0               |
| Pimelic acid                    | 0               |
| cinnamic acid                   | 0               |
| 4-aminosalicylic acid           | 0               |
| 6-hydroxy-2-naphthoic acid      | 0               |
| Indoleacetic acid               | 0               |
| Caffeic acid                    | 0               |
| Vanillic acid                   | 0               |

|                            |   |
|----------------------------|---|
| 3,4-dihydroxybenzoic acid  | 0 |
| Trans-ferulic acid         | 0 |
| Trans-p-coumaric acid      | 0 |
| Aminobenzoic acid          | 0 |
| Gallic acid                | 0 |
| orotic acid                | 0 |
| L-Asparagine               | 0 |
| L-Histidine                | 0 |
| L-Valine                   | 0 |
| L-DOPA                     | 0 |
| tryptophan                 | 0 |
| Tyrosine                   | 0 |
| Caffein                    | 0 |
| Riboflavin                 | 0 |
| Ascorbic acid              | 0 |
| 4,4'-dipyridyl (BPY)       | 0 |
| 1,2-Di(pyridin-4-yl)ethene | 0 |

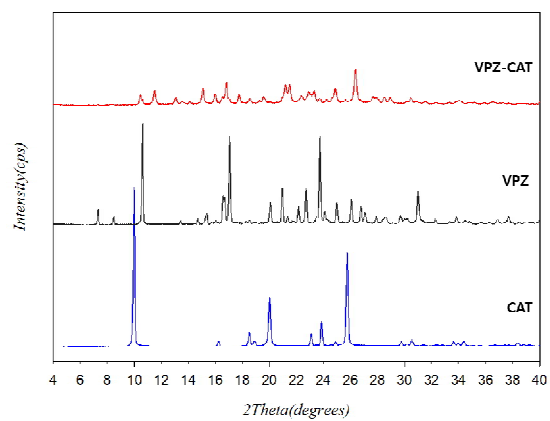

Figure S1. PXRD patterns of VPZ, CAT, and VPZ-CAT prepared by LAG.

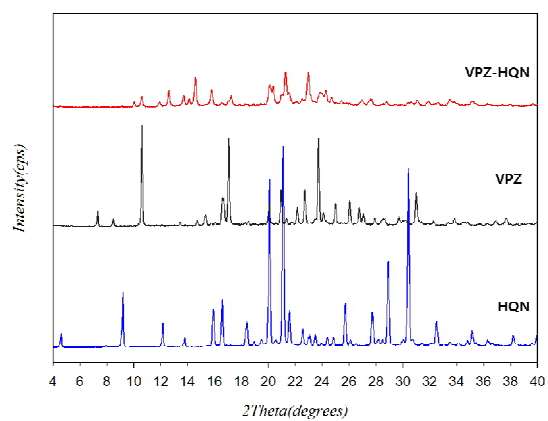

Figure S2. PXRD patterns of VPZ, HYQ, and VPZ-HYQ prepared by LAG.

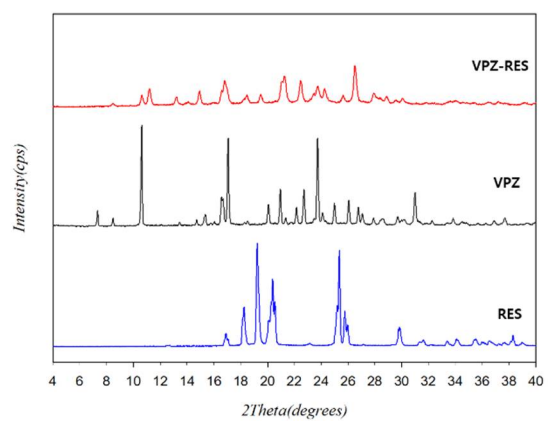

Figure S3. PXRD patterns of VPZ, RES, and VPZ-RES prepared by LAG.

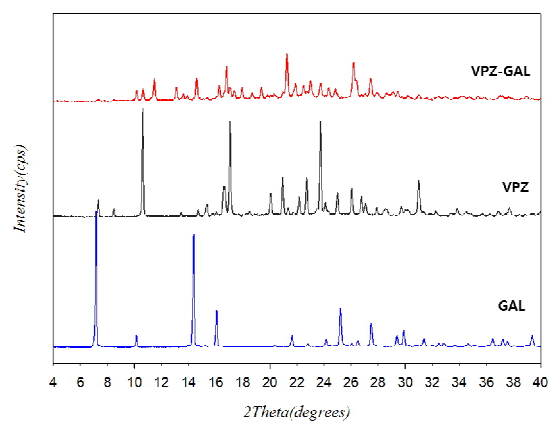

Figure S4. PXRD patterns of VPZ, GAL, and VPZ-GAL prepared by LAG.

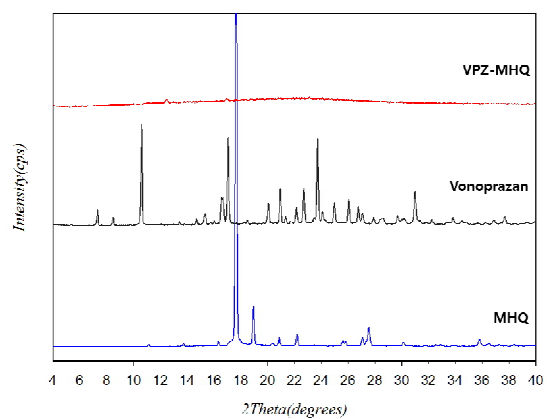

Figure S5. PXRD patterns of VPZ, MHQ, and VPZ-MHQ prepared by LAG.

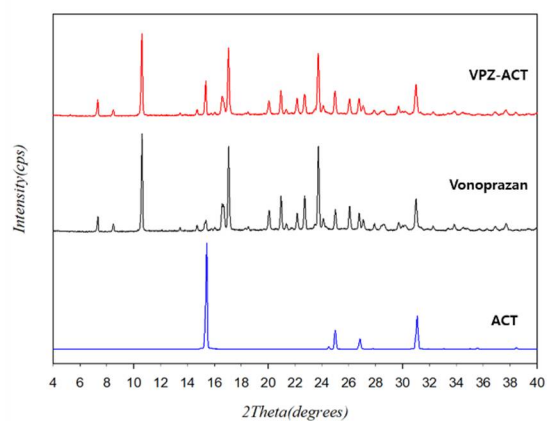

Figure S6. PXRD patterns of VPZ, ACT, and VPZ-ACT prepared by LAG.

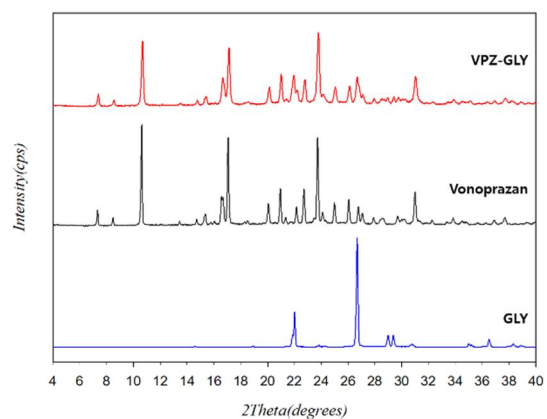

Figure S7. PXRD patterns of VPZ, GLY, and VPZ-GLY prepared by LAG.

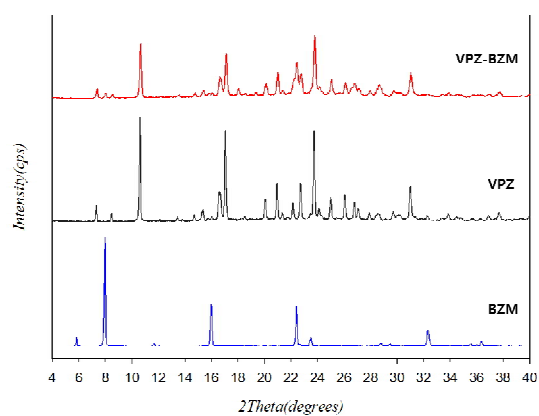

Figure S8. PXRD patterns of VPZ, BZM, and VPZ-BZM prepared by LAG.

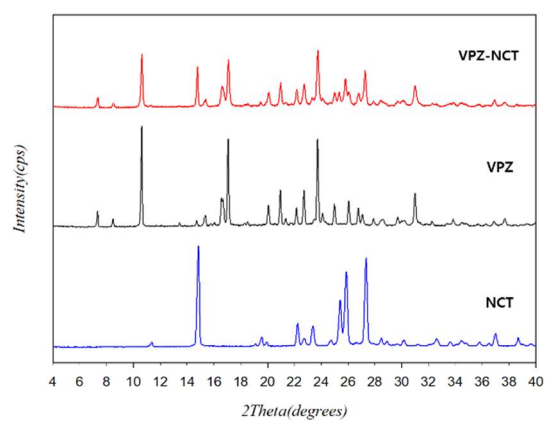

Figure S9. PXRD patterns of VPZ, NCT, and VPZ-NCT prepared by LAG.

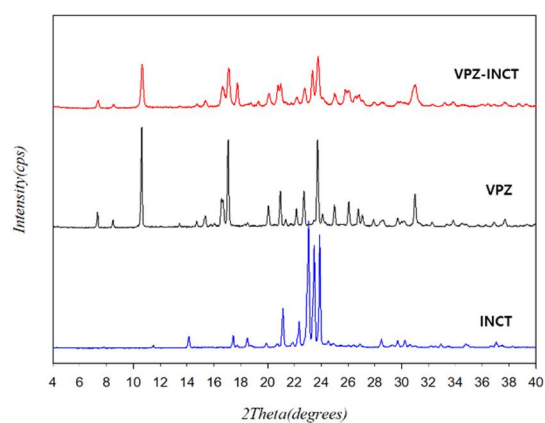

Figure S10. PXRD patterns of VPZ, INCT, and VPZ-INCT prepared by LAG.

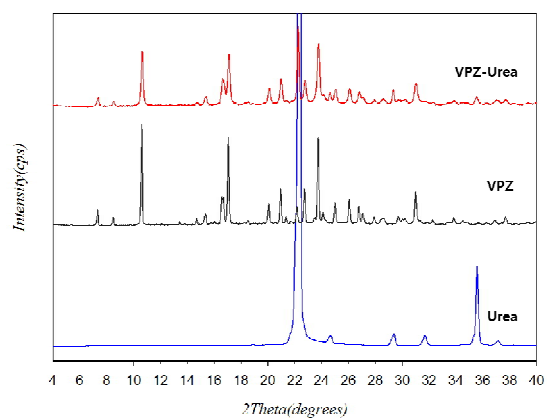

Figure S11. PXRD patterns of VPZ, Urea, and VPZ-Urea prepared by LAG.

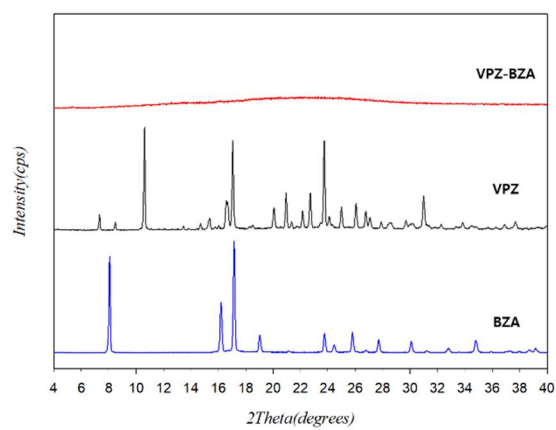

Figure S12. PXRD patterns of VPZ, BZA, and VPZ-BZA prepared by LAG.

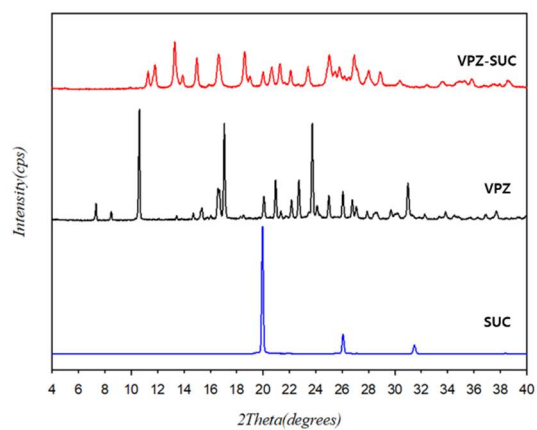

Figure S13. PXRD patterns of VPZ, SUC, and VPZ-SUC prepared by LAG.

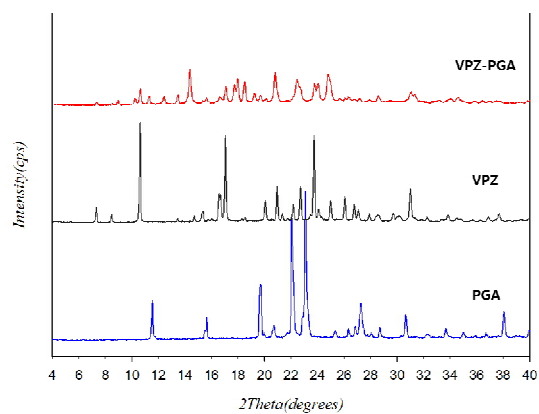

Figure S14. PXRD patterns of VPZ, PGA, and VPZ-PGA prepared by LAG.

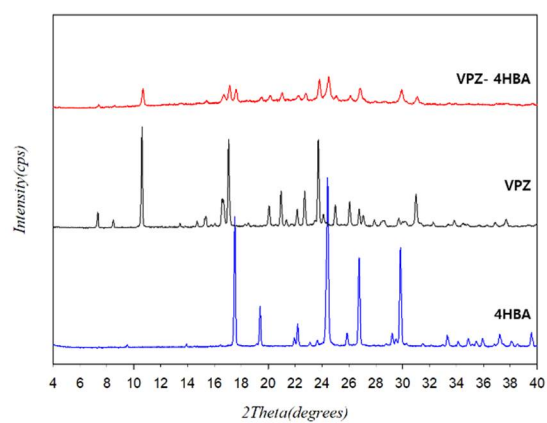

Figure S15. PXRD patterns of VPZ, 4HBA, and VPZ-4HBA prepared by LAG.

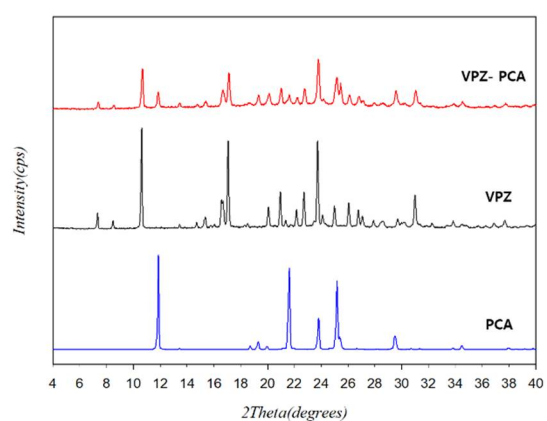

Figure S16. PXRD patterns of VPZ, PCA, and VPZ-PCA prepared by LAG.

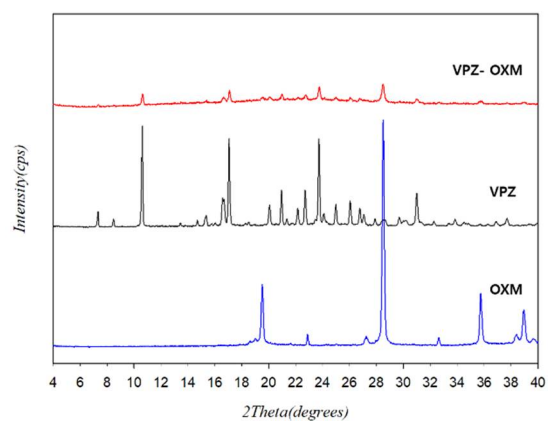

Figure S17. PXRD patterns of VPZ, OXM, and VPZ-OXM prepared by LAG.

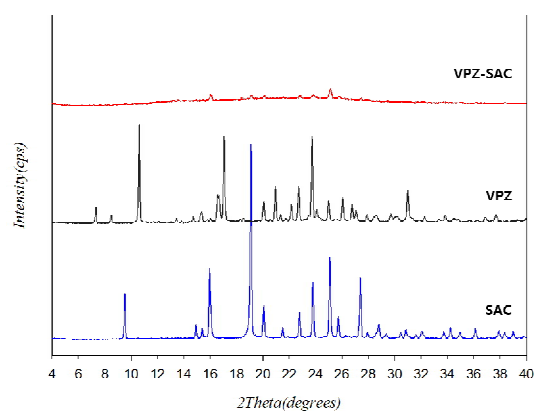

Figure S18. PXRD patterns of VPZ, SAC, and VPZ-SAC prepared by LAG.

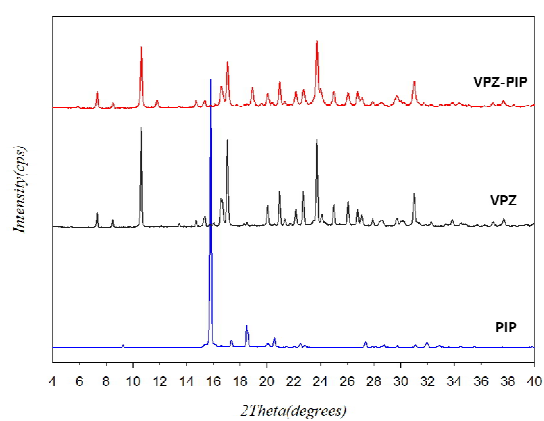

Figure S19. PXRD patterns of VPZ, PIP, and VPZ-PIP prepared by LAG.



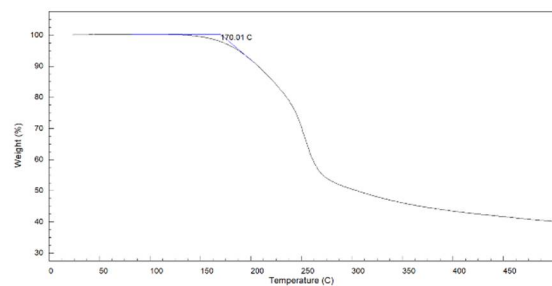

Figure S20. TGA thermogram of VPZ-CAT prepared by RC.

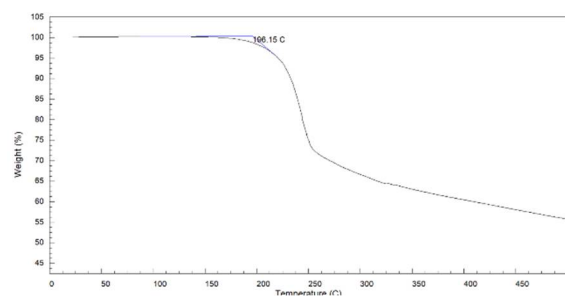

Figure S21. TGA thermogram of VPZ-GAL prepared by RC.

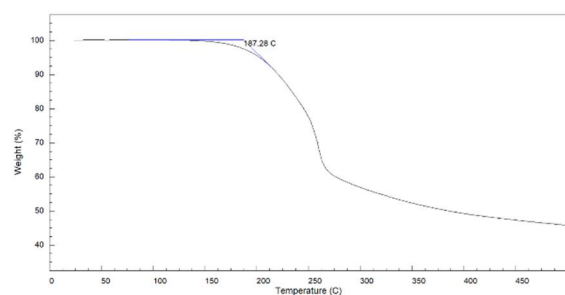

Figure S22. TGA thermogram of VPZ-RES prepared by RC.

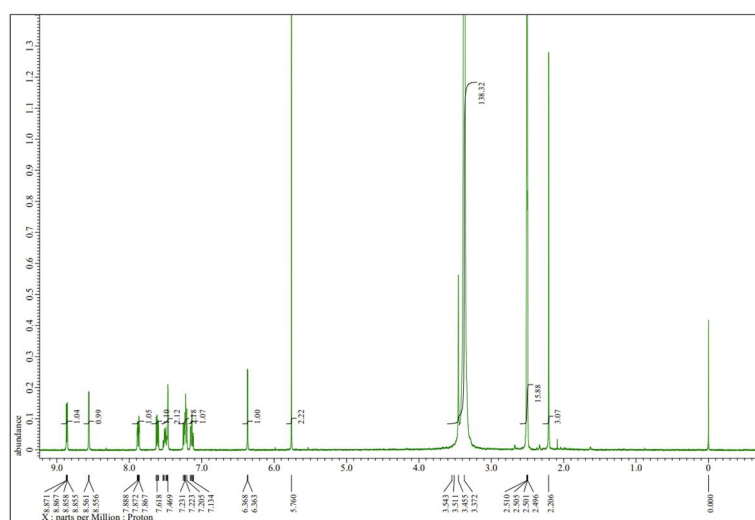

Figure S23.  $^1\text{H}$  NMR of VPZ.

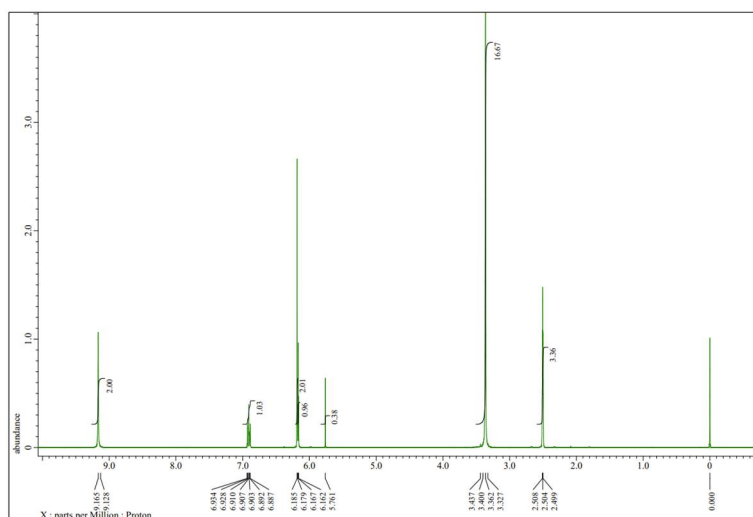

Figure S24.  $^1\text{H}$  NMR of RES.

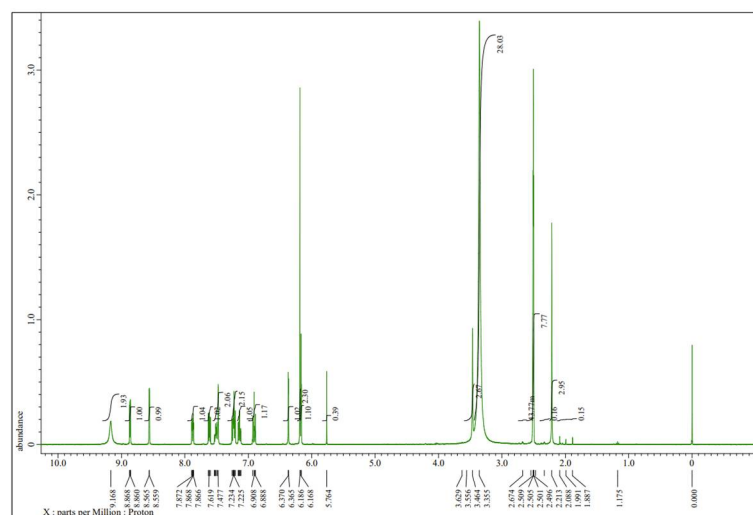

Figure S25.  $^1\text{H}$  NMR of VPZ-RES.

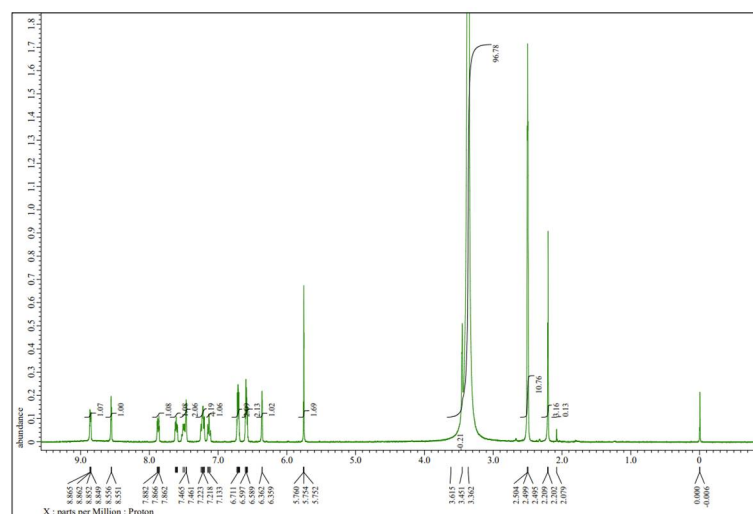

Figure S26.  $^1\text{H}$  NMR of CAT.

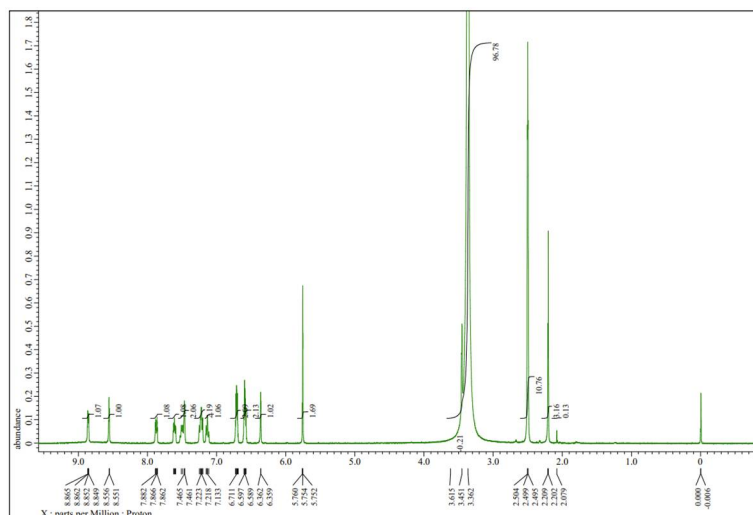

Figure S27. <sup>1</sup>H NMR of VPZ-CAT.

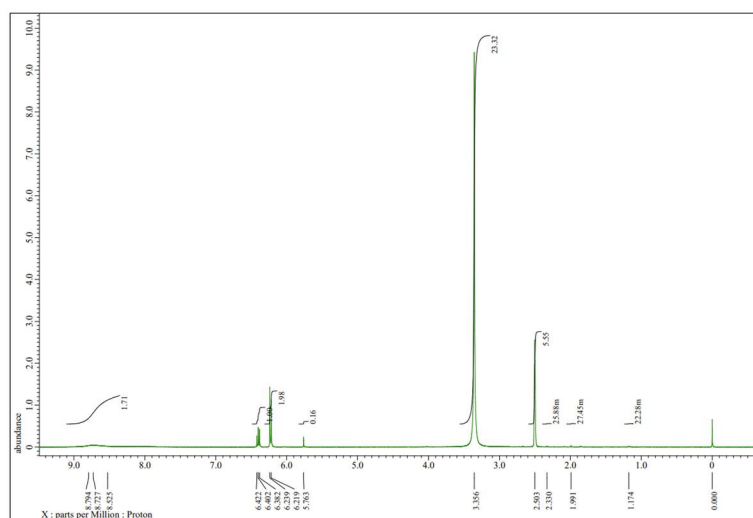

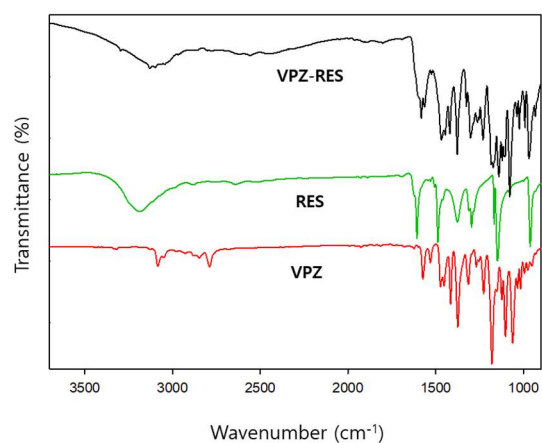

Figure S30. FT-IR spectra of VPZ, RES, and VPZ-RES prepared by RC.

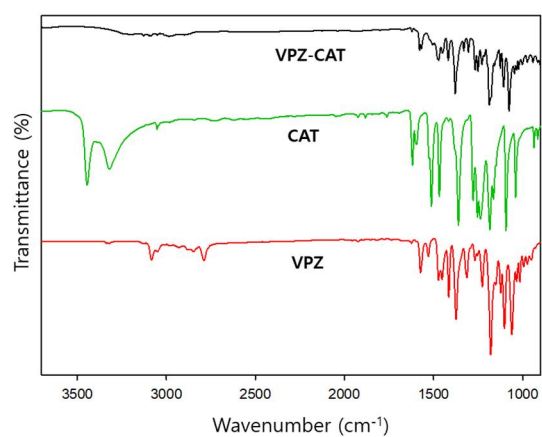

Figure S31. FT-IR spectra of VPZ, CAT, and VPZ-CAT prepared by RC

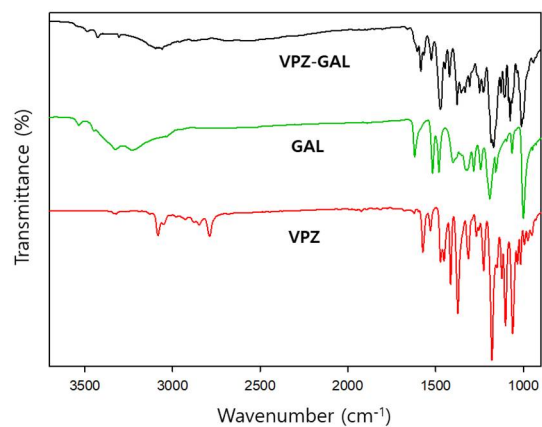

Figure S32. FT-IR spectra of VPZ, GAL, and VPZ-GAL prepared by RC.
